# Supplementary material
Source: PubMed Central journal article supplement (PMC7493283)
Supplement: sc9b07593_si_001.pdf [file sc9b07593_si_001.pdf]

# Supporting information

## Sized-controlled ZIF-8 nanoparticle synthesis from recycled mother liquors: environmental impact assessment

*Marta García-Palacín<sup>1</sup>, José Ignacio Martínez<sup>1</sup>, Lorena Paseta<sup>1</sup>, Adam Deacon<sup>2</sup>, Timothy Johnson<sup>3</sup>, Magdalena Malankowska<sup>1\*</sup>, Carlos Téllez<sup>1</sup>, Joaquín Coronas<sup>1\*</sup>*

<sup>1</sup>Chemical and Environmental Engineering Department, Instituto de Nanociencia de Aragón (INA), Instituto de Materiales de Aragón (ICMA), Universidad de Zaragoza-CSIC, 50018 Zaragoza, Spain.

<sup>2</sup>Johnson Matthey Technology Centre, Belais Avenue, Billingham, TS231LB, United Kingdom

<sup>3</sup>Johnson Matthey Technology Centre, Sonning Common, Reading RG49NH, United Kingdom.

\*Corresponding authors: Magdalena Malankowska, [magnal@unizar.es](mailto:magnal@unizar.es); Joaquín Coronas, [coronas@unizar.es](mailto:coronas@unizar.es)

Number of pages: 8

Number of figures: 6

Number of tables: 10

### Table of contents

|                                                              |    |
|--------------------------------------------------------------|----|
| Thermogravimetry results of 2-methylimidazole                | S2 |
| XRD patterns and Reitveld refinement of product A.1          | S2 |
| XRD patterns and Reitveld refinement of product A.3          | S3 |
| Fitting parameters of ZIF-8 and ZIF-L                        | S4 |
| Fitting parameters of the Original synthesis and product A.1 | S4 |
| Fitting parameters of product A.3                            | S6 |
| N <sub>2</sub> adsorption and desorption isotherms           | S7 |
| Thermogravimetric comparison of product A.2 and B.1          | S8 |
| Green metrics factors for each recycling step in product A.3 | S8 |
|                                                              | S1 |

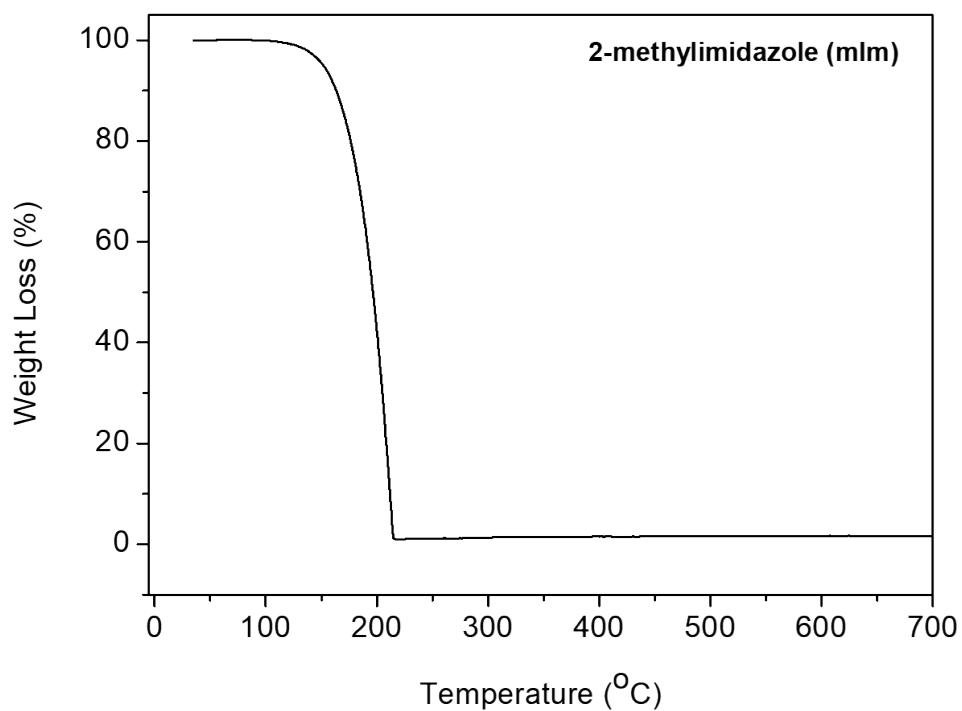

**Figure S1.** Thermogravimetry results of 2-methylimidazole (ligand)

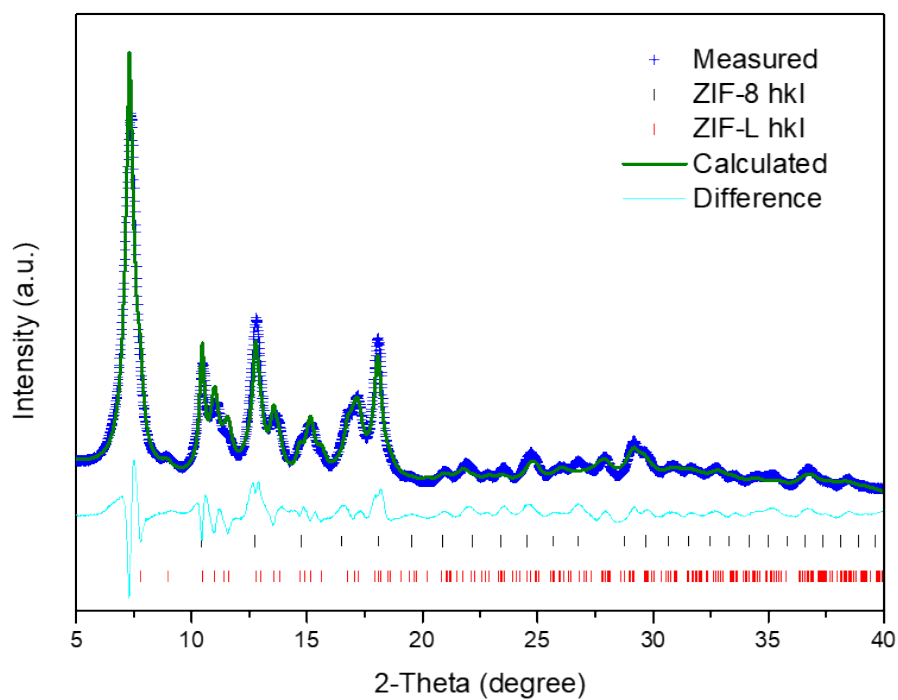

**Figure S2.** XRD pattern and Reitveld refinement of product A.1 done using GSAS II.  
Fit statistic  $R_{wp} = 10.42\%$

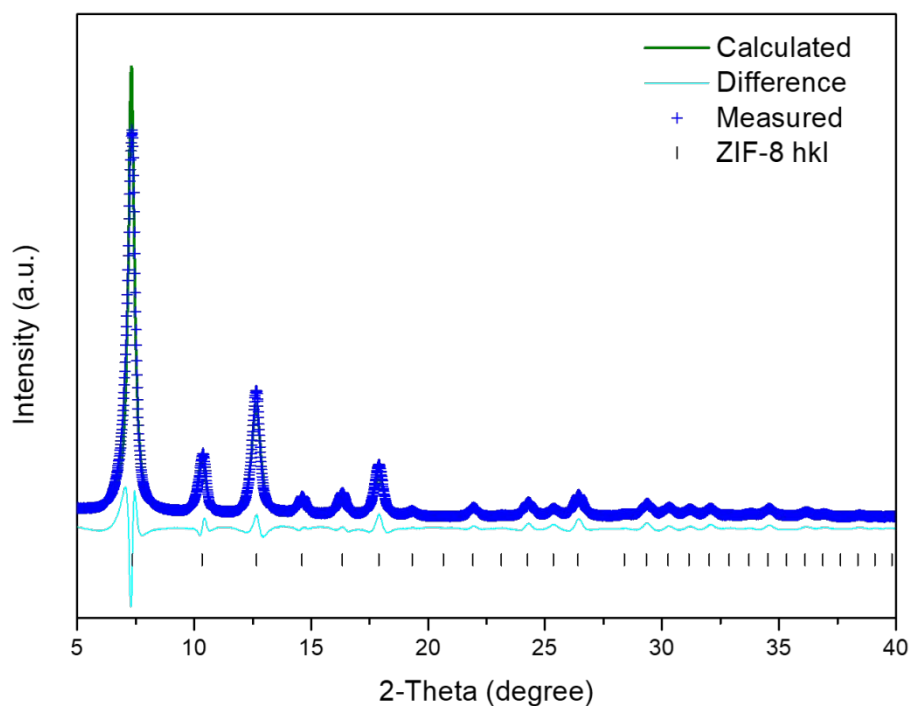

**Figure S3.** XRD patterns and Reitveld refinement of product A.3 done using GSAS II.  
Fit statistics  $R_{wp} = 15.47\%$

**Table S1.** Crystal lattice parameters used for the Reitveld refinements

| Compound                     | ZIF-8      | ZIF-L        |
|------------------------------|------------|--------------|
| Space group                  | I -4 3 m   | C m c a      |
| a / Å                        | 17.0095(8) | 24.11910(46) |
| b / Å                        | 17.0095(8) | 17.06045(33) |
| c / Å                        | 17.0095(8) | 19.73984(37) |
| Cell Volume / Å <sup>3</sup> | 4921.24    | 8122.6       |
| CCDC*                        | 864312     | 1509273      |

\* Cambridge crystallographic database Code

**Table S2.** Atom positions calculated from Reitveld refinement for Original synthesis

|                                    |          |
|------------------------------------|----------|
| <b>Space group</b>                 | I -4 3 m |
| <b>a / Å</b>                       | 16.939   |
| <b>b / Å</b>                       | 16.939   |
| <b>c / Å</b>                       | 16.939   |
| <b><math>\alpha</math> / °</b>     | 90       |
| <b><math>\beta</math> / °</b>      | 90       |
| <b><math>\gamma</math> / °</b>     | 90       |
| <b>Cell Volume / Å<sup>3</sup></b> | 4860.552 |

**Table S3.** Unit cell parameters calculated from Reitveld refinement for Original synthesis

| Label | Element | x      | y      | z      | frac |
|-------|---------|--------|--------|--------|------|
| Zn1   | Zn      | 0      | 0.5    | 0.75   | 1    |
| N1    | N       | 0.094  | 0.495  | 0.8062 | 1    |
| C2    | C       | 0.1215 | 0.512  | 0.8785 | 1    |
| C1    | C       | 0.132  | 0.6084 | 0.8175 | 1    |
| H1    | H       | 0.139  | 0.577  | 0.887  | 1    |
| C4    | C       | 0.0791 | 0.417  | 0.9209 | 1    |
| H4A   | H       | 0.057  | 0.531  | 0.814  | 0.5  |
| H4B   | H       | 0.122  | 0.78   | 1.114  | 0.5  |
| H4C   | H       | 0.322  | 0.41   | 0.972  | 0.5  |

**Table S4.** Atom positions of ZIF-8 calculated from Reitveld refinement for product A.1

|                                    |          |
|------------------------------------|----------|
| <b>Space group</b>                 | I -4 3 m |
| <b>a / Å</b>                       | 16.960   |
| <b>b / Å</b>                       | 16.960   |
| <b>c / Å</b>                       | 16.960   |
| <b><math>\alpha</math> / °</b>     | 90       |
| <b><math>\beta</math> / °</b>      | 90       |
| <b><math>\gamma</math> / °</b>     | 90       |
| <b>Cell Volume / Å<sup>3</sup></b> | 4787.785 |

**Table S5.** Unit cell parameters of ZIF-8 calculated from Reitveld refinement for product A.1

| Label | Element | x      | y       | z      | frac |
|-------|---------|--------|---------|--------|------|
| Zn1   | Zn      | 0.5    | 0       | 0.25   | 1    |
| C3    | C       | 0.624  | 0.0053  | 0.376  | 1    |
| N1    | N       | 0.5883 | -0.0357 | 0.3173 | 1    |
| C1    | C       | 0.6276 | -0.1088 | 0.316  | 1    |
| H1    | H       | 0.6165 | -0.1506 | 0.2817 | 1    |
| C4    | C       | 0.5985 | 0.0861  | 0.4015 | 1    |
| H4A   | H       | 0.557  | 0.1047  | 0.3672 | 0.5  |
| H4B   | H       | 0.6428 | 0.1218  | 0.3988 | 0.5  |
| H4C   | H       | 0.5791 | 0.0839  | 0.4551 | 0.5  |
| O1    | O       | 0.692  | 0.692   | 0.308  | 1    |
| O2    | O       | 0.816  | 0.816   | 0.184  | 1    |

**Table S6.** Atom positions of ZIF-L calculated from Reitveld refinement for product A.1

|                    |         |
|--------------------|---------|
| <b>Space group</b> | C m c a |
| <b>a / Å</b>       | 24.132  |
| <b>b / Å</b>       | 16.899  |
| <b>c / Å</b>       | 19.742  |

|                              |         |
|------------------------------|---------|
| $\alpha / ^\circ$            | 90      |
| $\beta / ^\circ$             | 90      |
| $\gamma / ^\circ$            | 90      |
| Cell Volume / $\text{\AA}^3$ | 8051.54 |

**Table S7.** Unit cell parameters of ZIF-L calculated from Reitveld refinement for product A.1

| Label | Element | x        | y         | z         | frac |
|-------|---------|----------|-----------|-----------|------|
| Zn1   | Zn      | 0.25     | 0.05545   | 0.25      | 1    |
| Zn2   | Zn      | 0.12592  | 0.3076    | 0.10051   | 1    |
| C11   | C       | 0.192631 | 0.18502   | 0.169324  | 1    |
| C12   | C       | 0.107139 | 0.174163  | 0.20478   | 1    |
| C13   | C       | 0.136613 | 0.111472  | 0.228753  | 1    |
| C14   | C       | 0.244739 | 0.219764  | 0.140634  | 1    |
| N15   | N       | 0.142758 | 0.219785  | 0.165943  | 1    |
| N16   | N       | 0.191557 | 0.122188  | 0.210246  | 1    |
| H12   | H       | 0.069834 | 0.18443   | 0.213023  | 1    |
| H13   | H       | 0.122365 | 0.069289  | 0.253076  | 1    |
| H14A  | H       | 0.240391 | 0.227311  | 0.092684  | 1    |
| H14B  | H       | 0.251914 | 0.26936   | 0.161963  | 1    |
| H14C  | H       | 0.275276 | 0.184869  | 0.148874  | 1    |
| C21   | C       | 0.187131 | -0.070366 | 0.320948  | 1    |
| C22   | C       | 0.208216 | -0.063042 | 0.428416  | 1    |
| C23   | C       | 0.236697 | -0.005556 | 0.394787  | 1    |
| C24   | C       | 0.160398 | -0.094943 | 0.255611  | 1    |
| N25   | N       | 0.175851 | -0.102989 | 0.381308  | 1    |
| N26   | N       | 0.220124 | -0.007642 | 0.327285  | 1    |
| H22   | H       | 0.210148 | -0.073566 | 0.474629  | 1    |
| H23   | H       | 0.262463 | 0.028698  | 0.413651  | 1    |
| H24A  | H       | 0.168355 | -0.149252 | 0.247121  | 1    |
| H24B  | H       | 0.120972 | -0.087673 | 0.25876   | 1    |
| H24C  | H       | 0.174759 | -0.063634 | 0.219147  | 1    |
| C31   | C       | 0        | 0.293683  | 0.095884  | 1    |
| C32   | C       | 0.0285   | 0.410237  | 0.126364  | 1    |
| C34   | C       | 0        | 0.212076  | 0.068055  | 1    |
| N35   | N       | 0.0461   | 0.334403  | 0.111144  | 1    |
| H32   | H       | 0.05126  | 0.453166  | 0.134976  | 1    |
| H34A  | H       | 0.01951  | 0.211263  | 0.025621  | 0.5  |
| H34B  | H       | 0.01804  | 0.177512  | 0.099552  | 0.5  |
| H34C  | H       | -0.03755 | 0.195058  | 0.061128  | 0.5  |
| C41   | C       | 0.109484 | 0.301873  | -0.053537 | 1    |
| C42   | C       | 0.141438 | 0.19848   | -0.001083 | 1    |
| C43   | C       | 0.129253 | 0.177824  | -0.06644  | 1    |
| C44   | C       | 0.091239 | 0.384281  | -0.067756 | 1    |
| N45   | N       | 0.133131 | 0.278973  | 0.004597  | 1    |
| N46   | N       | 0.11474  | 0.246255  | -0.10076  | 1    |
| H42   | H       | 0.153125 | 0.164888  | 0.033231  | 1    |
| H43   | H       | 0.12955  | 0.12843   | -0.08417  | 1    |

|      |     |          |          |           |       |
|------|-----|----------|----------|-----------|-------|
| H44A | H   | 0.106935 | 0.42031  | -0.035629 | 1     |
| H44B | H   | 0.102817 | 0.39849  | -0.112688 | 1     |
| H44C | H   | 0.051486 | 0.386254 | -0.065013 | 1     |
| H46  | H   | 0.110099 | 0.251592 | -0.143753 | 0.589 |
| C51  | C   | 0        | 0.259362 | 0.308363  | 0.823 |
| C52  | C   | 0.0284   | 0.380839 | 0.314675  | 0.823 |
| C54  | C   | 0        | 0.171427 | 0.308065  | 0.823 |
| N55  | N   | 0.0455   | 0.303716 | 0.303422  | 0.823 |
| H52  | H   | 0.05131  | 0.424139 | 0.320992  | 0.823 |
| H55  | H   | 0.07869  | 0.287921 | 0.294992  | 0.411 |
| H54A | H   | 0.032898 | 0.151104 | 0.329596  | 0.411 |
| H54C | H   | 0        | 0.154125 | 0.261757  | 0.411 |
| O11  | O-2 | 0.0322   | -0.013   | 0.0579    | 0.5   |
| O16  | O-2 | 0.1061   | 0.5076   | 0.4466    | 0.353 |

**Table S8.** Atom positions of ZIF-8 calculated from Reitveld refinement for product A.3

|                                    |         |
|------------------------------------|---------|
| <b>Space group</b>                 | I-4 3 m |
| <b>a / Å</b>                       | 17.317  |
| <b>b / Å</b>                       | 17.317  |
| <b>c / Å</b>                       | 17.317  |
| <b><math>\alpha</math> / °</b>     | 90      |
| <b><math>\beta</math> / °</b>      | 90      |
| <b><math>\gamma</math> / °</b>     | 90      |
| <b>Cell Volume / Å<sup>3</sup></b> | 5192.95 |

**Table S9.** Unit cell parameters of ZIF-8 calculated from Reitveld refinement for product A.3

| <b>Label</b> | <b>Element</b> | <b>x</b>  | <b>y</b>  | <b>z</b>  | <b>frac</b> |
|--------------|----------------|-----------|-----------|-----------|-------------|
| Zn1          | Zn             | 0.5       | 0         | 0.25      | 1.092       |
| C3           | C              | 0.624626  | -0.026644 | 0.375374  | 1.099       |
| N1           | N              | 0.583529  | -0.026403 | 0.323334  | 1.027       |
| C1           | C              | 0.62541   | -0.086968 | 0.321034  | 1.004       |
| H1           | H              | 0.391195  | -0.177687 | 0.337322  | 0.205       |
| C4           | C              | 0.605883  | 0.073919  | 0.394117  | 0.797       |
| H4A          | H              | 0.891395  | -0.080693 | 0.403958  | -0.62       |
| H4B          | H              | 0.434178  | 0.080895  | 0.365372  | -0.897      |
| H4C          | H              | -0.672335 | -0.608748 | -0.098628 | -0.31       |
| O1           | O              | 0.643977  | 0.643977  | 0.356023  | 0.392       |
| O2           | O              | 0.800451  | 0.800451  | 0.199549  | -0.727      |

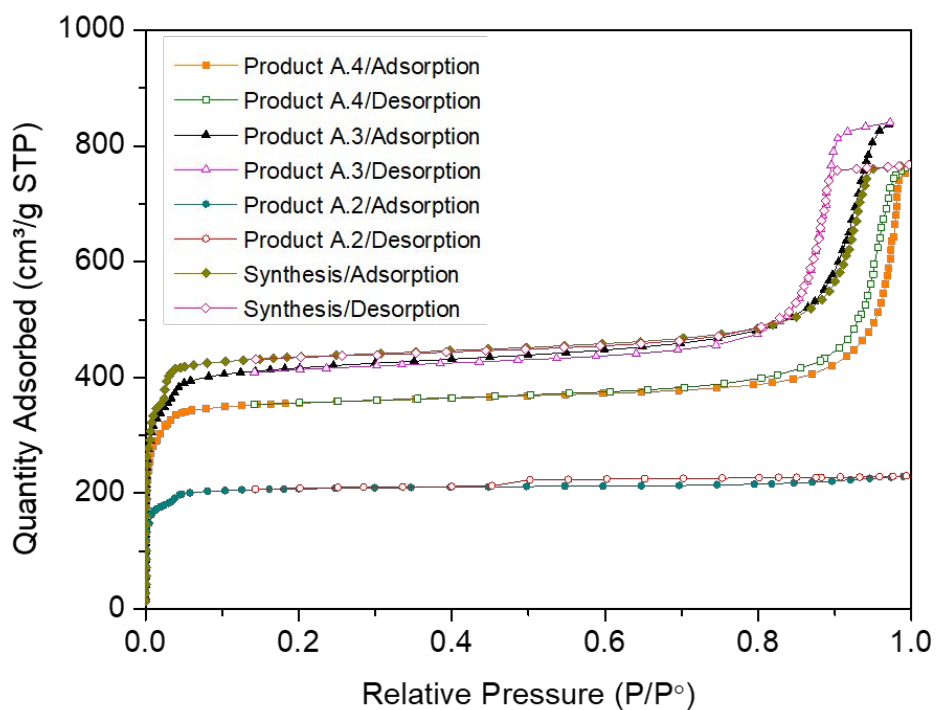

**Figure S4.** N<sub>2</sub> adsorption (full symbols) and desorption (empty symbols) isotherms for the ZIF-8 synthesis, and products A.2, A.3, and A.4

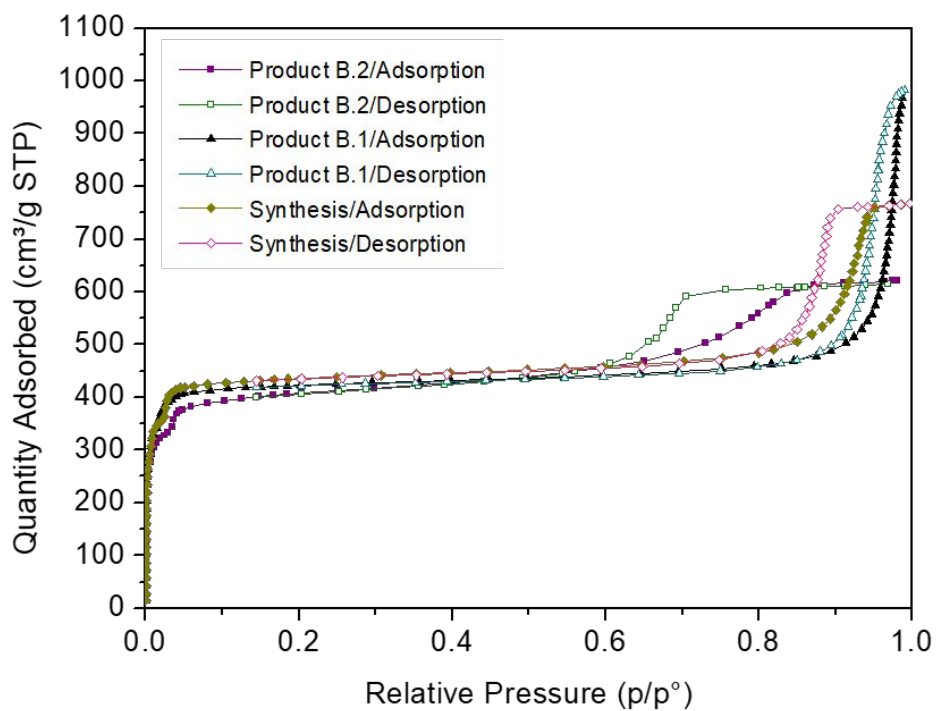

**Figure S5.** N<sub>2</sub> adsorption (full symbols) and desorption (empty symbols) isotherms for the ZIF-8 synthesis, and products B.1 and B.2

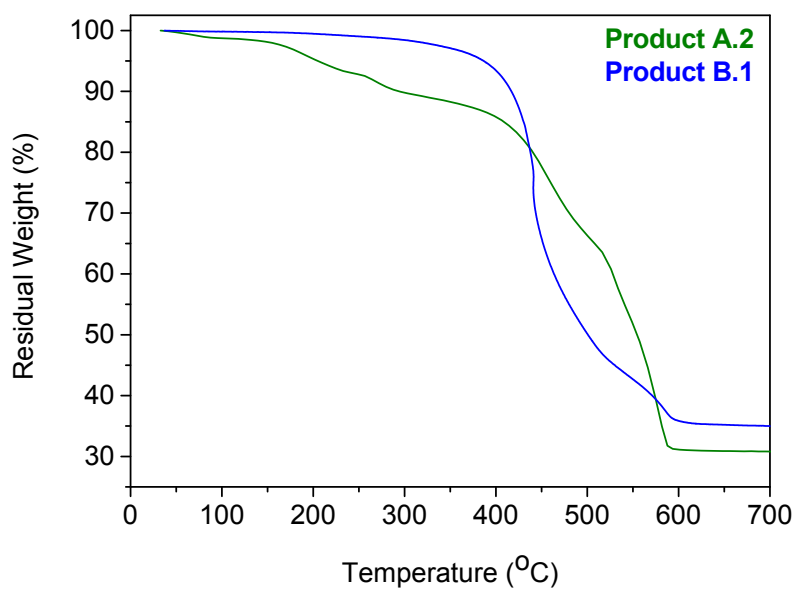

**Figure S6.** Thermogravimetric comparison of product A.2 and B.1

**Table S10.** Green metrics factors for each recycling step in product A.3

| Radial pentagon | Ideal process | Experimental process (Product A.3) |            |            |            |            |            |
|-----------------|---------------|------------------------------------|------------|------------|------------|------------|------------|
|                 |               | Synthesis                          | Recycled 1 | Recycled 2 | Recycled 3 | Recycled 4 | Recycled 5 |
| AE [-]          | 1             | 0.60                               | 0.64       | 0.60       | 0.60       | 0.60       | 0.60       |
| RME [-]         | 1             | 0.09                               | 0.13       | 0.17       | 0.20       | 0.22       | 0.24       |
| MRP [-]         | 1             | 0.97                               | 0.97       | 0.97       | 0.97       | 0.97       | 0.97       |
| 1/SF [-]        | 1             | 0.38                               | 0.40       | 0.44       | 0.45       | 0.46       | 0.47       |
| RY [-]          | 1             | 0.40                               | 0.53       | 0.67       | 0.75       | 0.82       | 0.88       |
